# Supplementary material for: Fishing without Hooks: Archaeological Evidence of Maritime Technologies in Panama
Source: Research Square preprint supplement (doi:10.21203/rs.3.rs-8745380/v1), 2026-02-19
Supplement: Supplementary file 1 [file 11cd581b34592d9bf93c5a86.xlsx]

## Sheet: Hoja1
Taxa	Sitio Drago	Cerro Brujo	La Pitahaya	Abrigo de Aguadulce	Ladrones	Cerro Mangote	Monagrillo	Zapotal	La Mula	Vampiros	Sitio Sierra	Cerro Juan Diaz	Jicarita	Don Bernardo	Bayoneta
Acanthuridae	X
Acanthurus sp	X
Acanthurus triostegus													X
Acanthurus xanthopterus													X
Prionurus laticlavius													X
Achirus scutum										X
Albulidae		X
Albula sp.										X				X	X
Albula esuncula										X	X
Albula nemoptera										X		X
Albula argentea
Albula vulpes	X					X	X
Ariidae	X		X	X			X	X						X
Ariopsis sp.			X
Ariopsis seemanni				X		X	X	X		X	X	X
Arius sp.			X			X
Notarius osculus				X		X				X	X	X
Occidentarius platypogon										X	X
Bagre sp.										X
Bagre panamensis			X			X	X			X	X	X
Bagre pinnimaculatus						X	X			X	X	X
Cathorops sp.						X	X	X		X	X
Cathorops dasycephalus											X
Cathorops fuerthii						X	X	X		X	X	X
Cathorops hypophthalmus						X				X		X
Cathorops multiradiatus						X	X			X	X	X
Cathorops steindachneri										X	X
Cathorops taylori												X
Cathorops tuyra
Cathorops jordan	X			X		X	X	X		X	X	X
Notarius sp.				X						X	X	X		X	X
Notarius cookei						X				X		X
Notarius kessleri						X	X	X		X	X	X
Notarius lentiginosus						X				X
Notarius planiceps										X		X
Notarius troschelii				X			X	X		X	X	X		X
Occidentarius sp.														X	X
Occidentarius platypogon						X				X		X		X
Sciades dowii				X		X		X		X	X	X
Sciades sp	X
Atherinopsidae
Trachelyopterus amblops				X			X		X	X	X
Trachelyopterus sp.
Balistidae	X												X
Balistes sp.	X												X	X
Balisters vetula	X
Balistes polylepis													X
Melichthys sp.													X
Pseudobalistes naufragium													X
Sufflamen sp.														X
Sufflamen verres													X
Batrachoididae	X	X		X				X
Batrachoides sp.						X	X	X						X	X
Batrachoides boulengeri							X	X		X		X
Batrachoides pacifici						X	X	X		X	X	X
Daector sp.														X	X
Daector dowi												X
Daector reticulata							X			X		X	X	X	X
Belonidae	X	X	X
Strongylura sp.	X										X
Strongylura exilis										X
Strongylura scapularis							X			X		X
Tylosurus sp.										X	X		X
Tylosurus crocodilus	X						X			X		X
Tylosurus fodiator										X
Tylosurus melanotus										X			X
Bothidae
Carangidae	X	X	X					X
Alectis sp.													X
Alectis ciliaris							X			X	X		X
Carangoides sp.
Carangoides otrynter										X	X
Caranx sp.	X	X								X	X	X		X	X
Caranx chrysos	X
Caranx caballus							X	X		X	X	X	X	X	X
Caranx caninus						X				X	X	X	X
Caranx hippos	X
Caranx lugubris
Caranx melampygus													X
Caranx sexfasciatus													X
Caranx vinctus										X		X
Caranx latus	X
Chloroscombrus sp.				X									X
Chloroscombrus orqueta						X	X	X	X	X	X	X	X
Chloroscombrus chrysurus	X
Decapterus sp.													X	X
Decapterus macarellus													X
Elagatis bipinnulata													X
Gnathanodon speciosus
Hemicaranx sp.							X	X		X
Hemicaranx leucurus										X		X
Hemicaranx zelotes										X
Oligoplites sp.	X							X		X	X
Oligoplites altus						X	X			X	X	X
Oligoplites refulgens							X	X		X	X	X
Oligoplites saurus							X			X	X
Selar sp.													X
Selar crumenophthalmus										X	X	X	X
Selene sp.	X						X			X	X
Selene brevoorti										X	X	X	X
Selene orstedii										X	X	X	X
Selene peruviana					X	X	X	X		X	X	X	X
Seriola sp.	X													X
Seriola rivoliana													X	X
Trachinotus sp.	X									X
Trachinotus kennedyi										X	X	X	X
Trachinotus rhodopus
Trachurus sp.
Centropomidae	X	X								X
Centropomus sp.	X	X	X	X		X	X	X		X
Centropomus armatus						X	X			X		X
Centropomus medius						X	X			X	X	X
Centropomus nigrescens						X	X	X		X		X
Centropomus robalito						X		X		X	X	X
Centropomus unionensis										X		X
Centropomus viridis						X				X
Astyanax sp.
Cichlidae
Aequidens sp.
Andinoacara coeruleopunctatus				X			X				X
Cichlasoma sp.
Talamancaheros sieboldii
Tomocichla sp.
Cirrhitidae
Cirrhitus rivulatus													X	X
Clupeidae	X
Coryphaena hippurus
Ctenolucius sp.
Ctenolucius hujeta											X
Cyphocharax sp.					X
Cyphocharax magdalenae				X							X
Citharichthys gilberti										X	X
Cyclopsetta panamensis
Cyclopsetta querna										X
Cyclopsetta sp.
Symphurus chabanaudi
Diodontidae	X	X	X											X	X
Diodon sp.		X											X
Chilomycterus	X	X
Diodon holocanthus
Diodon hystrix
Opisthonema libertate					X	X	X	X	X	X	X	X
Opisthonema sp.				X						X
Eleotridae	X	X	X
Dormitator sp.
Dormitator latifrons				X		X				X	X	X
Eleotris sp.								X
Eleotris picta				X		X				X	X	X
Gobiomorus sp.
Gobiomorus maculatus				X		X					X	X
Gobiomorus dormitor	X
Elops sp.
Elops saurus	X
Elops affinis						X				X		X
Opsanus sp	X
Sanopus barbatus	X
Engraulidae
Anchoa sp.										X
Anchoa panamensis										X
Anchoa spinifer
Anchovia macrolepidota										X		X
Cetengraulis mysticetus							X			X		X
Lycengraulis poeyi								X		X		X
Lycengraulis sp.
Chaetodipterus zonatus							X			X			X
Parapsettus panamensis								X		X	X	X
Hoplias sp.				X					X		X
Hoplias microlepis										X
Fistulariidae
Fistularia sp.
Fistularia corneta										X			X
Gerreidae	X					X
Diapterus sp	X
Diapterus peruvianus						X				X		X
Eucinostomus currani						X				X
Eucinostomus dowii										X
Eugerres sp.						X				X
Eugerres brevimanus						X
Eugerres lineatus						X
Gerres cinereus	X					X
Gobiidae
Bathygobius sp.
Bathygobius andrei
Gobioides peruanus						X						X
Rypticus nigripinnis										X					X
Haemulidae		X	X					X
Anisotremus sp.						X	X
Anisotremus caesius
Genyatremus dovii						X	X				X
Anisotremus interruptus													X	X
Genyatremus pacifici							X				X			X	X
Haemulon sp.	X	X												X	X
Haemulon flavolineatum	X
Haemulon parra	X
Haemulon plumieri	X
Haemulon sciurus	X
Haemulon flaviguttatum						X						X	X	X	X
Haemulon maculicauda													X	X	X
Haemulon scudderii													X	X
Haemulon steindachneri													X
Haemulopsis sp.								X					X
Haemulopsis elongatus										X	X	X
Haemulopsis leuciscus						X				X		X
Haemulopsis nitidus						X				X
Microlepidotus sp.														X	X
Microlepidotus brevipinnis
Orthopristis chalceus						X		X		X	X	X	X
Pomadasys sp.						X		X		X
Rhonciscus bayanus							X			X	X	X
Rhencus macracanthus						X	X			X	X	X
Rhencus panamensis								X		X	X	X
Xenichthys xanti										X		X
Pimelodella sp.
Holocentridae			X
Rhamdia sp.				X			X		X
Rhamdia guatemalensis											X			X
Hemiramphus sp.
Hemiramphus saltator										X
Hyporhamphus sp.
Hyporhamphus unifasciatus										X		X
Sargocentron suborbitale													X
Kyphosidae	X	X
Kyphosus sp.
Kyphosus vaigiensis													X	X
Kyphosus elegans													X	X	X
Kyphosus ocyurus													X	X
Kyphosus sectatrix	X
Labridae
Bodianus sp.
Bodianus diplotaenia													X
Bodianus pulchellus	X
Bodianus rufus	X
Halichoeres sp.	X
Lachnolaimus maximus	X
Atractosteus tropicus
Lobotidae
Lobotes pacifica						X					X
Lobotes surinamensis							X			X
Loricariidae
Hemiancistrus sp.
Hypostomus sp.				X
Hemiancistrus aspidolepis
Sturisoma sp.														X	X
Sturisomatichthys panamense				X					X
Lutjanidae		X	X					X					X
Hoplopagrus guentherii													X
Lutjanus sp.	X	X				X				X
Lutjanus aratus
Lutjanus argentiventris						X	X			X			X
Lutjanus colorado						X
Lutjanus guttatus						X						X	X
Lutjanus inermis													X
Lutjanus jordani													X
Lutjanus novemfasciatus						X				X
Lutjanus peru
Lutjanus viridis													X
Lutjanus analis	X
Lutjanus apodus	X
Lujanus jocu	X
Lutjanus synagris	X
Ocyurus chrysurus	X
Megalopidae		X
Megalops atlanticus	X	X
Monacanthidae
Mugilidae
Dajaus monticola										X		X
Chaenomugil proboscideus										X		X		X	X
Mugil sp.	X							X
Mugil curema										X				X
Mulloidichthys dentatus													X	X	X
Pseudupeneus grandisquamis													X	X	X
Muraenidae
Gymnothorax sp.	X
Gymnothorax castaneus
Muraena sp.										X
Muraena clepsydra
Muraena lentiginosa
Muraenesocidae
Cynoponticus coniceps										X		X
Nematistius pectoralis
Ophichthidae
Echiophis brunneus												X
Myrichthys tigrinus							X
Citharichthys gilberti										X				X	X
Polydactylus sp.						X								X	X
Polydactylus approximans						X	X	X		X	X	X		X
Polydactylus opercularis						X	X	X		X	X	X
Holacanthus passer													X
Pomacanthus zonipectus
Abudefduf concolor
Abudefduf troschelii													X
Abudefduf sp.	X
Microspathodon dorsalis													X
Ilisha fuerthii						X	X	X	X	X	X	X
Odontognathus sp.				X								X		X	X
Odontognathus panamensis										X				X	X
Opisthopterus sp.						X
Opisthopterus dovii							X					X		X	X
Opisthopterus equatorialis
Scaridae		X
Scarus sp.	X												X
Scarus compressus
Scarus ghobban
Scarus perrico
Scarus rubroviolaceus
Sparisoma radians	X
Sparisoma rubripinne	X
Sparisoma viride	X
Sparisoma sp	X
Sciaenidae	X	X	X					X
Bairdiella sp.			X			X		X		X	X
Bairdiella armata						X	X	X		X		X
Bairdiella ensifera						X	X			X	X	X
Cynoscion sp.	X		X			X	X	X		X	X
Cynoscion albus				X		X	X			X	X	X
Cynoscion phoxocephalus								X		X		X
Cynoscion praedatorius							X			X		X
Cynoscion squamipinnis						X	X			X
Cynoscion stolzmanni						X				X	X	X
Cynoscion jamaicensis	X
Isopisthus remifer							X			X
Larimus sp.	X		X
Larimus acclivis							X	X		X		X
Larimus argenteus										X		X			X
Larimus pacificus										X
Larimus breviceps	X
Macrodon mordax												X
Menticirrhus sp.
Menticirrhus elongatus										X
Menticirrhus panamensis						X	X	X		X	X	X
Micropogonias sp.
Micropogonias altipinnis						X	X	X		X	X	X
Micropogonias furnieri	X
Nebris occidentalis										X		X
Ophioscion sp.								X
Ophioscion scierus						X	X		X	X	X
Ophioscion typicus				X	X	X		X	X	X	X	X
Ophioscion vermicularis						X	X
Paralonchurus dumerilii						X				X	X	X
Pogonias sp.
Stellifer sp.
Stellifer chrysoleuca										X	X	X
Stellifer fuerthii										X		X
Stellifer oscitans						X	X	X		X
Stellifer zestocarus														X
Stellifer colonensis	X
Umbrina xanti														X
Scombridae	X		X
Auxis sp.
Auxis rochei
Auxis thazard													X
Euthynnus sp.													X
Euthynnus lineatus											X		X
Euthynnus aleterattus	X
Katsuwonus pelamis													X
Scomberomorus sp.	X													X
Scomberomorus maculatus	X
Scomberomorus sierra							X	X		X	X	X
Scomberomorus/Acanthocybium sp.														X
Thunnus albacares
Thunnus obesus
Scorpaenasp.	X													X	X
Scorpaena mystes
Serranidae	X	X
Mycteroperca bonaci	X
Mycteroperca sp	X
Epinephelus sp.	X	X
Epinephelus itajara	X
Hyporthodus acanthistius														X
Epinephelus analogus						X							X		X
Epinephelus labriformis													X
Alphestes multiguttatus
Paralabrax callaensis															X
Cephalopholis colonus
Paranthiassp.
Rypticus sp.
Rypticus bicolor										X
Sparidae	X	X	X
Archosargus sp	X
Calamus sp.	X
Calamus brachysomus
Ctenosciaena gracilicirrhus	X
Sphyraenidae		X
Sphyraena sp.	X	X	X					X
Sphyraena guanchacho	X
Sphyraena barracuda	X
Sphyraena ensis										X	X	X	X
Rachycentrom canadum	X
Sternopygus sp.										X
Sternopygus aequilabiatus				X							X	X
Stromateidae (Unid.)
Peprilus sp.							X	X
Peprilus medius										X		X
Peprilus snyderi							X			X	X	X			X
Synbranchus sp.
Synbranchus marmoratus				X			X		X		X	X			X
Tetraodontidae			X				X				X
Arothron sp.
Arothron hispidus												X	X
Guentheridia sp.															X
Guentheridia formosa										X	X	X
Sphoeroides sp.			X								X			X
Sphoeroides annulatus						X	X			X	X	X
Sphoeroides rosenblatti										X
Carcharhinidae							X	X		X
Carcharhinus sp.	X		X					X		X
Carcharhinus altimus						X						X		X
Carcharhinus leucas	X					X				X	X	X	X
Carcharhinus limbatus											X				X
Carcharhinus porosus												X
Negaprion brevirostris										X
Rhizoprionodon longurio							X			X	X	X
Galeocerdo cuvier			X
Ginglymostoma cirratum			X
Sphyrnidae		X
Sphyrna sp.			X								X
Sphyrna lewini							X			X		X
Sphyrna media															X
Sphyrna tiburo
Dasyatidae						X
Dasyatis sp.	x	X	X				X
Hypanus longus										X		X
Aetobatus sp.
Aetobatus narinari		X									X	X
Narcine sp.
Narcine entemedor							X			X
Styracura pacifica
Pristis sp.						X					X
Rhinoptera steindachneri
Squaliformes
Mustelus sp.
Urolophidae (Urotrygonidae?)
Urotrygon sp.
Urotrygon munda										X
